# Supplementary material for: Pyranometer offsets triggered by ambient meteorology: insights from laboratory and field experiments
Source: Copernicus journal article supplement (doi:10.5194/amt-10-1169-2017), 2017-03-21
Supplement: Supplementary file 1 [file amt-10-1169-2017-supplement.pdf]

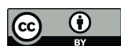

*Supplement of*

## **Pyranometer offsets triggered by ambient meteorology: insights from laboratory and field experiments**

**Sandro M. Oswald et al.**

*Correspondence to:* Sandro M. Oswald ([sandro.oswald@boku.ac.at](mailto:sandro.oswald@boku.ac.at))

The copyright of individual parts of the supplement might differ from the CC-BY 3.0 licence.

**Table S1:** Characteristics of the different CMP21 pyranometers and the heating/ventilation systems used in this study.

| <b>January 2016 (Laboratory &amp; Field Campaign 1)</b> | System I | System II | System III | Reference |
|---------------------------------------------------------|----------|-----------|------------|-----------|
| Acronym                                                 | EIG      | KSO34     | DAV        | EIG       |
| Serial number of CMP21                                  | 100393   | 100579    | 110716     | 100536    |
| Sensitivity [ $\mu\text{V}/\text{W m}^{-2}$ ]           | 8.80     | 9.02      | 8.95       | 8.76      |
| Serial number of HV-system                              | 0931666  | 34.2016   | 015        | 0931661   |
| <b>April/May 2016 (Field Campaign 2)</b>                |          |           |            |           |
| Acronym                                                 | EIG      | KSO34     | DAV        | EIG       |
| Serial number of CMP21                                  | 100579   | 100579    | 100579     | 100536    |
| Sensitivity [ $\mu\text{V}/\text{W m}^{-2}$ ]           | 9.02     | 9.02      | 9.02       | 8.76      |
| Serial number of HV-system                              | 0931666  | 34.2016   | 015        | 0931661   |

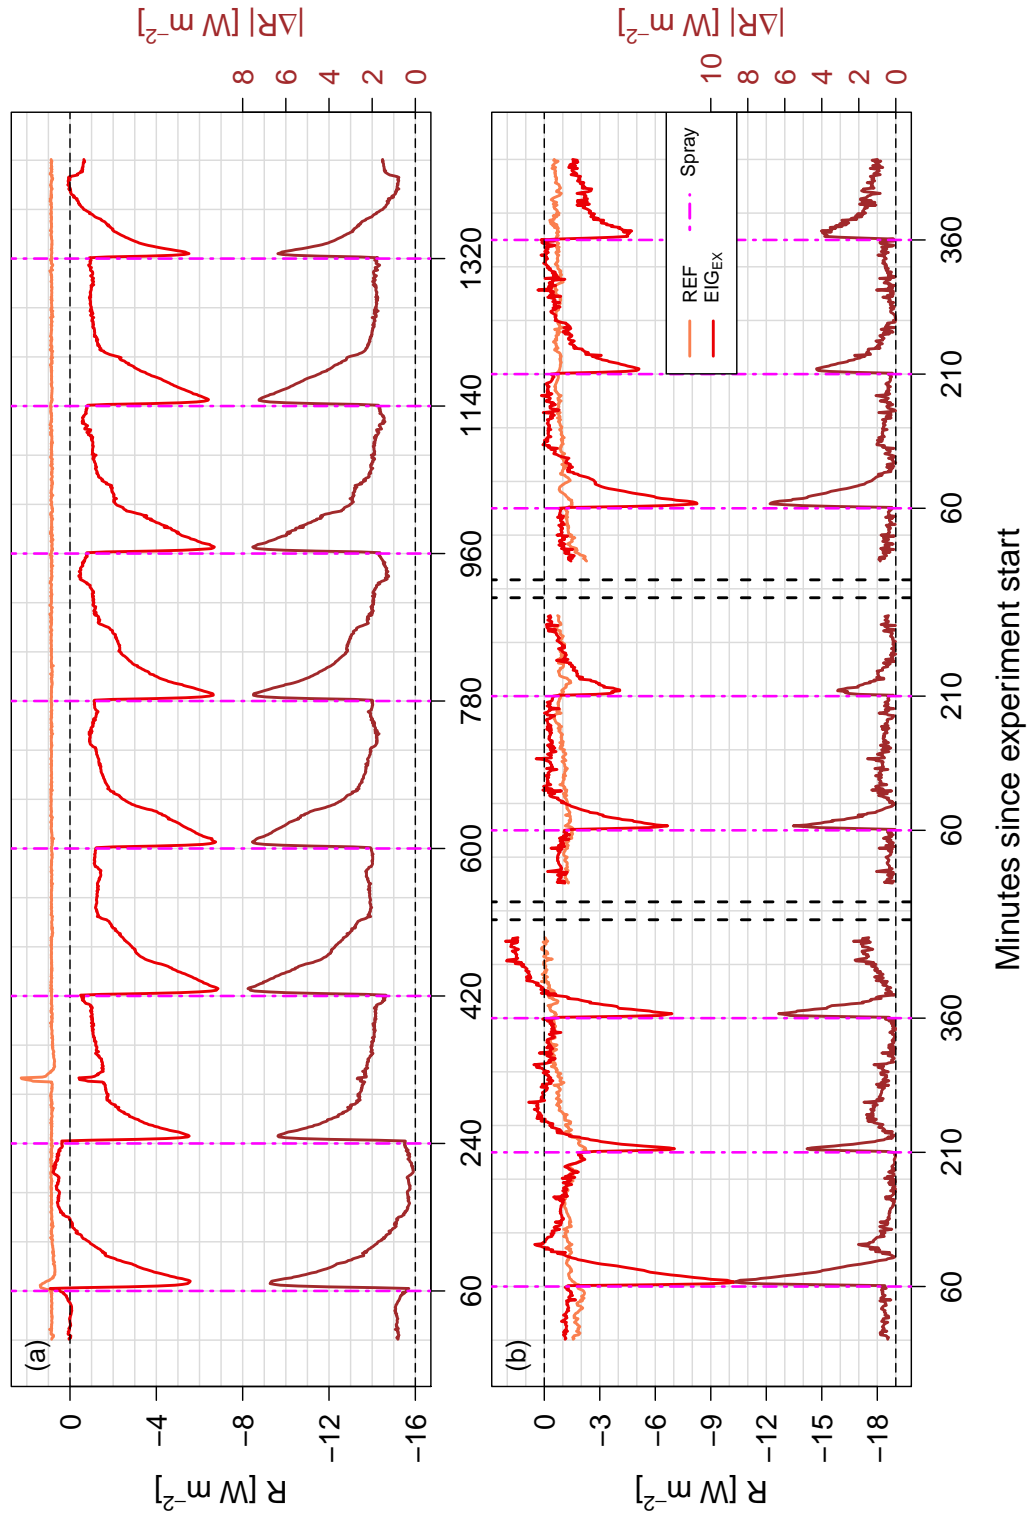

**Figure S1:** Time series of the radiation ( $R$ ) measured by the reference (REF, coral, Eigenbrodt HV-system) and experimental pyranometer (EIGEX, red, Eigenbrodt HV-system) and absolute difference ( $|\Delta R|$ ) between REF and EIGEX during (a) laboratory conditions and (b) ambient environmental conditions. All field measurements have been performed during nighttime. Measurement series is continuous in (a) while start point of subpanels (separated by vertical double dashed lines) in (b) is always 18:30 UTC. Note: scales of y-axes differ between panels.

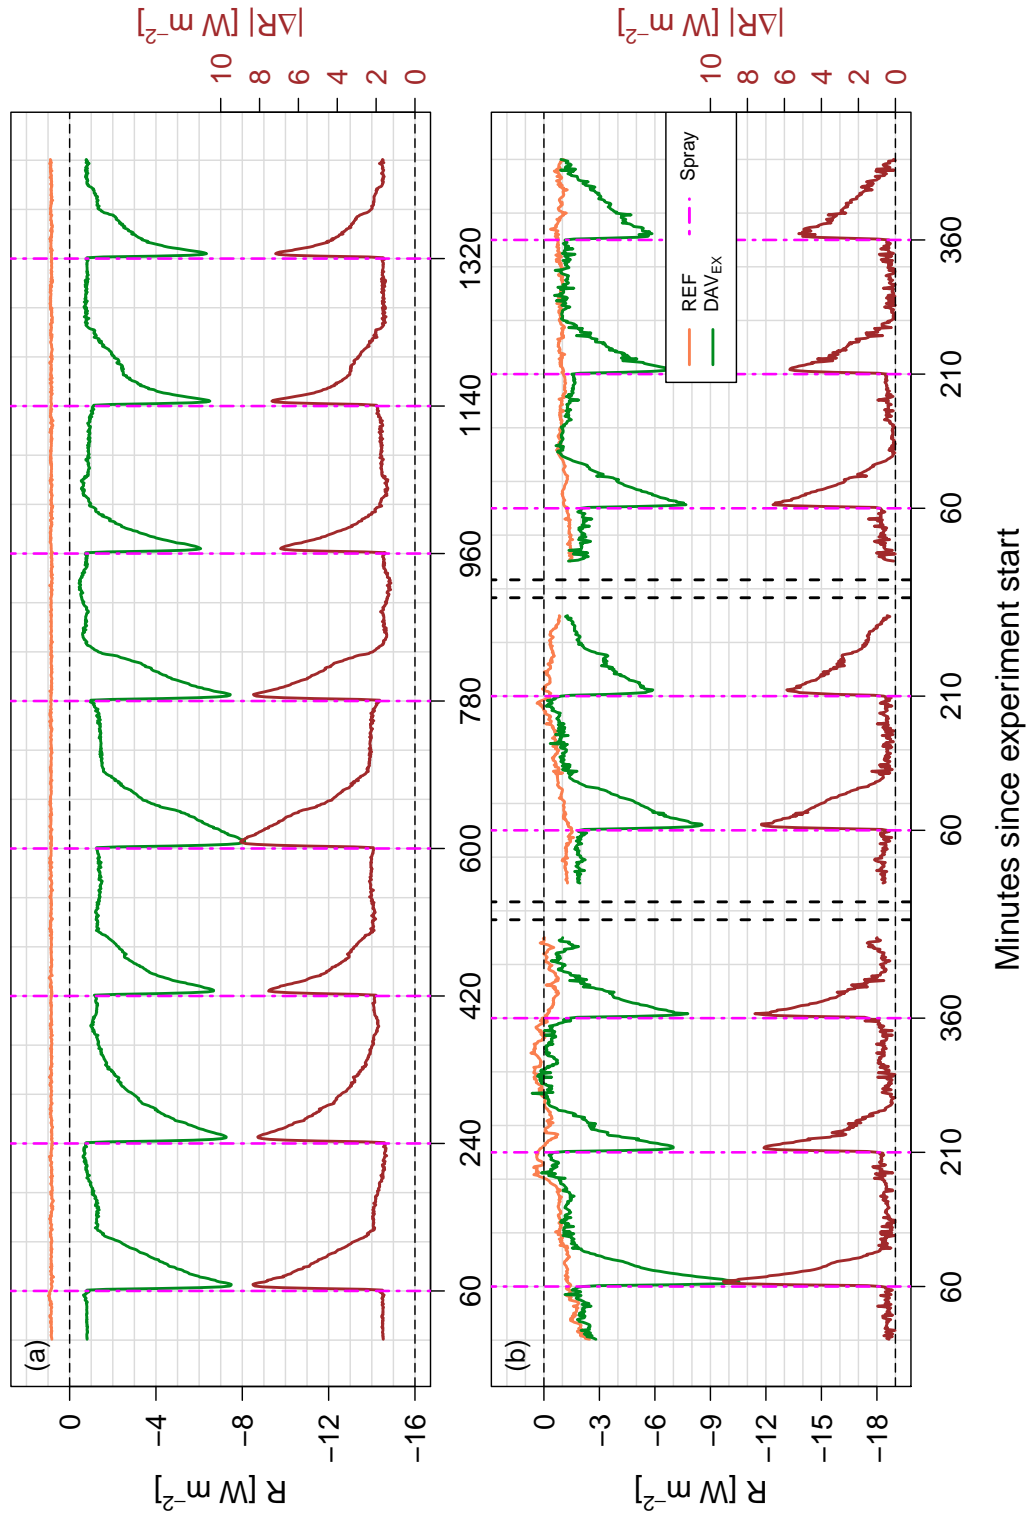

**Figure S2:** Time series of the radiation ( $R$ ) measured by the reference (REF, coral, Eigenbrodt HV-system) and experimental pyranometer (DAV<sub>EX</sub>, green, Davos HV-system) and absolute difference ( $|\Delta R|$ ) between REF and DAV<sub>EX</sub> during (a) laboratory conditions and (b) ambient environmental conditions. All field measurements have been performed during nighttime. Measurement series is continuous in (a) while start point of subpanels (separated by vertical double dashed lines) in (b) is always 18:30 UTC. Note: scales of y-axes differ between panels.
